1 Agonists of orally expressed TRP channels stimulate salivary secretion and modify the salivary  
2 proteome

3

4 Jack William Houghton<sup>1</sup>, Guy Carpenter<sup>2</sup>, Joachim Hans<sup>3</sup>, Manuel Pesaro<sup>4</sup>, Steven Lynham<sup>5</sup>, Gordon  
5 Proctor<sup>2</sup>

6

7 <sup>1</sup> Cambridge Institute for Medical Research, University of Cambridge (Cambridge, UK)

8 <sup>2</sup> Faculty of Dentistry, Oral & Craniofacial Sciences, King's College London (London, UK)

9 <sup>3</sup> Symrise AG (Holzminden, Germany)

10 <sup>4</sup> Symrise AG (Holzminden, Germany), present address: Sunstar Suisse SA (Etoy, Switzerland)

11 <sup>5</sup> Proteomics Facility, King's College London (London, UK)

12

13 \*Corresponding author: Jack William Houghton

14 E-mail: [jwh65@cam.ac.uk](mailto:jwh65@cam.ac.uk)

15

16 Running title: TRP channels agonists modify the salivary proteome

17

## TRP channels agonists modify the salivary proteome

18

### 19 **Abbreviations**

|    |          |                                                                    |
|----|----------|--------------------------------------------------------------------|
| 20 | CARD10   | CAspase Recruitment Domain-containing protein 10                   |
| 21 | DTT      | DiThioThreitol                                                     |
| 22 | LC-MS/MS | Liquid Chromatography - tandem Mass Spectrometry                   |
| 23 | GO       | Gene Ontology                                                      |
| 24 | IEF      | IsoElectric Focusing                                               |
| 25 | LDS      | Lithium Dodecyl Sulphate                                           |
| 26 | MS       | Mass Spectrometry                                                  |
| 27 | PG       | Propylene Glycol                                                   |
| 28 | PGK1     | PhosphoGlycerate Kinase 1                                          |
| 29 | TCEP     | Tris (2-CarboxyEthyl) Phosphine                                    |
| 30 | TEAB     | TriEthylAmmonium Bicarbonate                                       |
| 31 | TMT      | Tandem Mass Tag                                                    |
| 32 | TRP      | Transient Receptor Potential                                       |
| 33 | TRPA1    | Transient Receptor Potential cation channel, subfamily A, member 1 |
| 34 | TRPM8    | Transient Receptor Potential cation channel subfamily M member 8   |
| 35 | TRPV1    | Transient Receptor Potential cation channel subfamily V member 1   |
| 36 | WMS      | Whole Mouth Saliva                                                 |
| 37 | UWMS     | Unstimulated Whole Mouth Saliva                                    |

38

39

## TRP channels agonists modify the salivary proteome

### 40 **Abstract**

41

42 Natural compounds that can stimulate salivary secretion are of interest in developing treatments for  
43 xerostomia, the perception of a dry mouth, that affects between 10 and 30% of the adult and elderly  
44 population. Chemesthetic transient receptor potential (TRP) channels are expressed in the surface of  
45 the oral mucosa. The TRPV1 agonists capsaicin and piperine have been shown to increase salivary  
46 flow when introduced into the oral cavity but the sialogogic properties of other TRP channel agonists  
47 have not been investigated. In this study we have determined the influence of different TRP channel  
48 agonists on the flow and protein composition of saliva.

49

50 Mouth rinsing with the TRPV1 agonist nonivamide or menthol, a TRPM8 agonist, increased whole  
51 mouth saliva (WMS) flow and total protein secretion compared to unstimulated saliva, the vehicle control  
52 mouth rinse or cinnamaldehyde, a TRPA1 agonist. Nonivamide also increased the flow of labial minor  
53 gland saliva but parotid saliva flow rate was not increased. The influence of TRP channel agonists on  
54 the composition and function of the salivary proteome was investigated using a multi-batch quantitative  
55 mass spectrometry method novel to salivary proteomics. Inter-personal and inter-mouth rinse variation  
56 was observed in the secreted proteomes and, using a novel bioinformatics method, inter-day variation  
57 was identified with some of the mouth rinses. Significant changes in specific salivary proteins were  
58 identified after all mouth rinses. In the case of nonivamide, these changes were attributed to functional  
59 shifts in the WMS secreted, primarily the over representation of salivary and non-salivary cystatins  
60 which was confirmed by immunoassay.

61

62 This study provides new evidence of the impact of TRP channel agonists on the salivary proteome and  
63 the stimulation of salivary secretion by a TRPM8 channel agonist, which suggests that TRP channel  
64 agonists are potential candidates for developing treatments for sufferers of xerostomia.

## TRP channels agonists modify the salivary proteome

### 65 **Introduction**

66 TRP (Transient Receptor Potential) channels are a superfamily of non-selective cation channels that  
67 respond to a variety of somatosensory and endogenous stimuli. TRPV1, 3, 4, TRPA1 and TRPM8 are  
68 expressed in the oral cavity that have thermo- and chemoreceptive functions. They are expressed on  
69 mucosal and epithelial free afferent nerve endings of myelinated A $\delta$  and non-myelinated C fibres (1),  
70 oral epithelial cells (2-4), taste buds (5, 6), and keratinocytes (7).

71

72 Cinnamaldehyde is a TRPA1 agonist, which is produced synthetically and found in cinnamon, a spice  
73 that comes from the bark of cinnamon trees (8). Cinnamaldehyde makes up 90% of the essential oil  
74 extracted from cinnamon bark. Upon contact, cinnamaldehyde provokes a feeling of warmth (8) and  
75 has potential anti-inflammatory (9-11) and anti-cancer (12-18) properties. Menthol is a TRPM8 agonist  
76 that provokes a cooling sensation. It is found in mint leaves and produced synthetically (19). Nonivamide  
77 is a capsaicinoid that elicits a burning sensation (20). It is structurally very similar to the more widely  
78 studied TRPV1 agonist capsaicin and is naturally found in chilli peppers or produced synthetically.

79

80 The salivary response to basic tastants is well studied but the salivary response to TRP channel  
81 agonists requires further investigation. Increased salivary flow rate and specific protein secretion have  
82 been demonstrated in response to other tastants (21-24) and there are studies demonstrating increases  
83 in salivary flow rates and specific protein changes in response to the TRPV1 agonists (25-29) but there  
84 has been limited study of agonists to other TRP channels, despite expression of these channels in the  
85 oral cavity, nor has the mechanism of TRP channel agonist stimulated salivary secretion been  
86 elucidated.

87

88 Studying compounds that can stimulate salivary flow is of interest to the development of treatments for  
89 xerostomia, the perception of a dry mouth, that affects between 10 and 30% of the adult and elderly  
90 populations (30, 31). Acidic tastants that strongly stimulate salivary secretion erode enamel tissues, so  
91 alternative molecules are sought (32). Although xerostomia is often associated with hyposalivation,  
92 where the WMS flow rate is reduced by ~50% (33), this is not always the case (34). Xerostomia in the  
93 absence of hyposalivation may be due to changes in the interaction of saliva with oral surfaces due to  
94 the altered integrity of salivary proteins (35) or changes in saliva rheology (36). There is evidence that

## TRP channels agonists modify the salivary proteome

95 TRP agonists modify the rheological properties of saliva but the mechanism by which these changes  
96 occur remains to be elucidated. Taken together, identifying compounds that not only induce salivary  
97 secretion but also modify the rheological properties of saliva is of interest to developing treatments for  
98 xerostomia.

99

100 Specific protein changes in saliva in response to differing stimuli are possible due to the many sources  
101 of proteins which are likely to respond differently to different nerve mediated stimuli. For example, the  
102 submandibular and sublingual glands secrete in response to olfaction (37) whereas the parotid glands  
103 do not (38). Conversely, the parotid glands are preferentially stimulated by chewing which results in a  
104 higher amylase output (39). In these scenarios, proteins associated with specific glands, e.g. higher  
105 amylase secretion by the parotid glands or mucin secretion by the submandibular and sublingual  
106 glands, will have a relatively increased abundance when compared to unstimulated levels.

107

108 The regulation of specific proteins separate from preferential gland stimulation has also been reported.  
109 Annexin A1 and calgranulin A are upregulated in WMS through an inflammatory-like response after  
110 mouth rinsing with bitter, umami and sour tastants (40). Bader et al. demonstrated the upregulation of  
111 lysozyme in saliva stimulated by citric acid rinse (41). The TRPV1 agonist 6-gingerol upregulated  
112 salivary sulfhydryl oxidase 1 resulting in reduced 2-furfurylthiol levels in exhaled breath and thus  
113 reduction in the perceived sulphur-like after-smell (42). However, the mechanism of these specific  
114 protein upregulations has not been elucidated.

115

116 The present study is formed of two parts. A bottom-up quantitative proteomics study of the salivas  
117 secreted by two participants in response to menthol, cinnamaldehyde, nonivamide and propylene glycol  
118 (PG) that were compared to unstimulated saliva using mass spectrometry. In addition, data on WMS  
119 flow rates and protein output were also collected. In order to improve the identification of lower  
120 abundance salivary proteins, a method novel to salivary proteomics was used. Secondly, studies were  
121 conducted to confirm the specific protein changes of the proteomes of salivas identified in the  
122 proteomics study and to consider the mechanism by which the compounds exert their effects on the  
123 salivary proteomes.

124

TRP channels agonists modify the salivary proteome

## 125 **Experimental Procedures**

### 126 Experimental Design and Statistical Rationale

127 For the proteomics study, the proteome of 60 WMS samples, obtained from two male volunteers of  
128 ages 24 and 27, were analysed by TMT quantitative mass spectrometry. Forty eight experimental  
129 samples consisting of WMS produced after mouth rinsing were split randomly across six TMT10plex  
130 batches with each batch containing two controls consisting of pooled unstimulated saliva from each  
131 participant. The 48 WMS samples were collected from two participants after being exposed to eight  
132 conditions each with three experimental repeats. In a further study of the effects of agonists on WMS  
133 secretion, 25 participants were recruited (the demographic information of each participant group is  
134 shown in

135 Table 1) six of these subjects also participated with further participants in the following studies. For the  
136 parotid saliva study, eight volunteers were recruited ( $38.7 \pm 5.3$  years, male  $n = 4$ , female  $n = 4$ ). For  
137 the lower labial gland saliva study, ten volunteers were recruited ( $29.4 \pm 4.7$  years, male  $n = 5$ , female  
138  $n = 5$ ). For all studies, volunteers were healthy individuals recruited by internal advertisement with the  
139 following exclusion criteria: on prescription medication, age  $> 65$  years or  $< 18$  years, suffering from oral  
140 discomfort. The controls and statistical tests used for each analysis are described below.

141

#### 142 *Proteomics study of TRP agonist stimulation on two subjects.*

143 Forty eight saliva collections were made in total, each collection including an unstimulated saliva  
144 sample, followed by a mouth rinse and then two post-mouth rinse saliva samples (Table 2). Eight  
145 different mouth rinse solutions were tested in triplicate: nonivamide, cinnamaldehyde, menthol and PG  
146 (Symrise AG) (Table 2). The solutions were prepared in pre-weighed universal tubes and the total  
147 weight recorded. The compounds were diluted in water (Buxton) on the day of collection and were  
148 stored at room temperature. Participants were asked not to consume food, water or smoke in the 1 hour  
149 prior to collection. The following guidance was given to each participant prior to each collection: tilt your  
150 head slightly forward to allow saliva to pool underneath the tongue; do not move your mouth unless it  
151 is to spit out collected saliva; spit out whenever it is comfortable; do not swallow. For each collection,  
152 the following protocol was adhered to: One minute of unstimulated WMS was collected in a pre-weighed  
153 universal tube; 10 mL of mouth rinse was then taken into the mouth for 30 seconds and spit back into  
154 a pre-weighed universal tube; two, one minute collections of post-mouth rinse WMS in pre-weighed

## TRP channels agonists modify the salivary proteome

155 universal tubes. Immediately after collection, participants were asked, “How would you rate the intensity  
156 of the mouth rinse” and were asked to give a rating from 0 – 10 on a visual analogue scale alongside  
157 an oral description of their perception of the mouth rinse. One collection was carried out per day at 2pm  
158 and the order of mouth rinses were randomised for each participant. All samples were weighed in the  
159 universal tube straight after collection. Saliva was then processed for storage prior to mass  
160 spectrometry analysis: samples were transferred to ice cooled 1.5 mL microtube for centrifugation (13  
161 500 rpm, 5 minutes, 4 °C). Supernatants were removed, frozen at -20 °C and finally moved to -80 °C  
162 storage; the pellets were discarded.

163

### 164 WMS Saliva Collection

#### 165 *Effects of TRP agonists on WMS flow rates*

166 Cinnamaldehyde, menthol and nonivamide were obtained from Symrise AG and prepared in PG. 300  
167 ppm cinnamaldehyde, 500 ppm menthol, 1ppm nonivamide and  $3 \times 10^4$  ppm PG were prepared by  
168 diluting in water (Buxton) in pre-weighed universal tubes and the total weights were recorded. The  
169 concentration of PG in the nonivamide, menthol and cinnamaldehyde mouth rinses was  $3 \times 10^3$ ,  $1 \times 10^4$   
170 and  $3 \times 10^4$  ppm respectively. The solutions were kept at room temperature (20 °C). Participants were  
171 asked not to consume food, water or smoke in the 1 hour prior to collection. Prior to collection each  
172 participant was asked to tilt their head slightly forward to allow saliva to pool underneath the tongue, to  
173 not move their mouth unless it was to spit out collected saliva, to spit out whenever it is comfortable and  
174 to not swallow. Five minutes of unstimulated WMS was collected in a pre-weighed universal tube as a  
175 control. Ten mL of a control mouth rinse containing either the equivalent concentration of PG as in the  
176 TRP agonist containing mouth rinse or water was then taken into the mouth for 30 seconds and spat  
177 back into a pre-weighed universal tube, this was followed by five one minute collections of WMS into  
178 pre-weighed universal tubes. This was repeated with the experimental mouth rinse. All samples were  
179 weighed in the universal tube immediately after collection. Samples were kept on ice after collection.  
180 The neat saliva samples were aliquoted into 2 mL microtubes and then centrifuged (13 500 rpm, 4 °C,  
181 5 minutes). The supernatant was removed, aliquoted and stored at -20 °C.

182

### 183 Parotid Saliva Collection

## TRP channels agonists modify the salivary proteome

184 Five 10 mL solutions were prepared: water (Buxton); propylene glycol ( $3.0 \times 10^4$  ppm), menthol (100  
185 ppm), cinnamaldehyde (60 ppm), nonivamide (1 ppm). These solutions were prepared in pre-weighed  
186 universal tubes and the total weights recorded. The solutions were kept at room temperature (20 °C).  
187 Lashley cups were fitted over the exit of the Stenson's ducts, secured and correct fitting was tested by  
188 the administration of a few drops of 2% citric acid onto the tongue to stimulate parotid secretion. Time  
189 was allowed so that the collection tubes of the Lashley tubes were filled with parotid saliva. Prior to  
190 collection each participant was asked to not swish any solution around in their mouth in order to prevent  
191 Lashley cups being dislodged. The volunteer was given 10 mL water to practice holding the solution in  
192 the mouth and spitting it out. Unstimulated parotid saliva was collected in a pre-weighed universal tube  
193 for 5 minutes. Ten mL of water (Buxton) was then taken into the mouth and held for 5 minutes. During  
194 this time parotid saliva was collected in a pre-weighed universal tube. This was repeated with the control  
195 and TRP agonist solutions in the following order: propylene glycol, menthol, cinnamaldehyde, and  
196 nonivamide. A two minute break was taken between each solution. Saliva samples were kept on ice  
197 after collection. The neat saliva samples were aliquoted into 2 mL microtubes and then centrifuged (13  
198 500 rpm, 4 °C, 5 minutes). The supernatant was removed, aliquoted and stored at -20 °C.

199

### 200 Lower labial gland saliva collection

201 A cotton roll was placed over each Stenson duct's papilla and under the tongue to absorb major gland  
202 saliva. The inferior labial surface was dried, and unstimulated lower labial saliva was allowed to bead  
203 on the surface of the inferior labium for 2 minutes. A 2 cm x 1 cm piece of pre-weighed Whatman's  
204 (General Electric) filter paper was then placed on the lower labial surface with one of the 1 cm edges  
205 halfway down the mid-point of the inferior labium to collect the beads of saliva. The saliva-soaked filter  
206 paper was placed in a pre-weighed 1.5 mL microtube, weighed and the flow rate calculated by  
207 subtraction of the pre-weighed paper and pre-weighed microtube weights and divided by the time of  
208 collection in minutes. To allow for slight variations in the size of the filter paper, flow rates were scaled  
209 according to the mass of the dried filter paper. This process was repeated but with a 30 second mouth  
210 rinse of either  $3.0 \times 10^4$  ppm PG, 300 ppm cinnamaldehyde, 500 ppm menthol or 1 ppm nonivamide  
211 being administered prior to the drying of the inferior labium. The following guidance was given to each  
212 participant prior to collection: ensure the mouth rinse bathes the surface of your lower lip; do not swallow  
213 the mouth rinse. A three minute break, or until the perception of the previous mouth rinse had



## TRP channels agonists modify the salivary proteome

214 diminished, was taken between each solution. Saliva infused filter paper samples were kept on ice after  
215 collection.

216

217 Saliva infused filter paper was placed into 0.5 mL microtubes that had 4 needle-sized holes pierced into  
218 their underside. Each 0.5 mL microtube was then placed into a 1.5 mL microtube and centrifuged (13  
219 000 rpm, 4 °C, 5 minutes). The saliva collected in the 1.5 mL microtube was immediately processed for  
220 SDS PAGE (see below) with the following modification: the entire volume of the collected saliva (~1 µL)  
221 was treated with 10 µL lithium dodecyl sulphate (LDS) sample buffer and 1 µL dithiothreitol (DTT) prior  
222 to heating and electrophoresis.

223

### 224 Quantitative tandem mass spectrometry

225 The first minute and second minute post-mouth rinse samples from each collection were pooled. The  
226 24 unstimulated samples from each of the two participants (48 in total) were pooled into two  
227 unstimulated pools, one for each participant. Five µL of each pooled sample was added to 95 µL  
228 phosphate buffered saline (137mM NaCl, 2.7 mM KCl, 10 mM Na<sub>2</sub>HPO<sub>4</sub>, 1.8 mM KH<sub>2</sub>PO<sub>4</sub>, pH 7.4) for  
229 protein quantification using a Bradford assay (Thermo Scientific, USA). Absorbance of each sample  
230 was read by spectrophotometer at 595 nm and compared to a standard curve of bovine serum albumin  
231 of known protein concentration. Fifty µg of protein was extracted from each sample and frozen at -80°C.  
232 Frozen samples were freeze dried and reconstituted in 70 µL 100 mM triethylammonium bicarbonate  
233 (TEAB) and 0.1% sodium dodecyl sulphate (SDS). 10 µL 8mM tris (2-carboxyethyl) phosphine (TCEP)  
234 in 100 mM TEAB, 0.1% SDS was added to each sample and incubated at 55°C for one hour. 10 µL 375  
235 mM iodoacetamide (IAA) in 100 mM TEAB, 0.1% SDS was added to each sample and incubated at  
236 room temperature for 30 minutes. 4 µL of 0.25 µg/µL trypsin (Roche, sequencing grade) was added to  
237 each sample and left overnight at 37 °C.

238

239 Forty one µL of TMT reagent was added to each of the 48 post mouth rinse samples and the twelve  
240 unstimulated pool samples (see Table 3 for details) and incubated at room temperature for one hour.  
241 Eight µL of 5% hydroxylamine was added to each sample and left at room temperature for 15 minutes.  
242 Samples from each 10plex batch were pooled into six 10plex sample pools and stored at -80 °C prior  
243 to freeze drying until completion.

## TRP channels agonists modify the salivary proteome

244

245 IEF fractionation was carried out using the Agilent 3100 OFFGEL system (Agilent Technologies Inc,  
246 Germany) and was carried out according to the manufacturers protocol. 1.8 mL OFFGEL buffer stock  
247 added to each sample for reconstitution. Six OFFGEL strips with a linear pH gradient ranging from 3 to  
248 10, one for each 10plex sample pool, were hydrated in 50  $\mu$ L OFFEGL rehydration solution for 15  
249 minutes. 12-fraction frames were fitted to each of the strips and 150  $\mu$ L of reconstituted sample loaded  
250 into each fraction well. IEF was carried out under the following conditions: 20 kVh (100 hours, V: 500-  
251 5400 V, max. I: 50  $\mu$ A. Upon completion, each fraction was removed and frozen at -80  $^{\circ}$ C. Fractions  
252 were thawed on ice and pooled into six fraction pools (Fraction 1 with 7, 2 with 8, 3 with 9, 4 with 10, 5  
253 with 11 and 6 with 12). Ten  $\mu$ L of elution buffer (50% acetonitrile (ACN), 0.1% formic acid) was added  
254 to each sample. Zip-Tips were hydrated twice in 10  $\mu$ L hydration solution (50% ACN, trifluoroacetic acid  
255 (TFA)) and then washed in 1  $\mu$ L of wash solution (0.1% TFA). S10  $\mu$ L samples was washed through  
256 the Zip-Tip 10 times before eluting with elution solution (0.1% TFA). The elute was frozen at -80  $^{\circ}$ C  
257 prior to freeze drying until completion. Fractions were reconstituted in 10  $\mu$ L 50mM ammonium  
258 bicarbonate. The peptides from each fraction were resolved using reverse-phase chromatography on a  
259 75  $\mu$ M C18 EASY column using a 3-step gradient of 5-40% ACN and a 95% ACN wash in 0.1% formic  
260 acid at a rate of 300  $\mu$ L/min over 220 minutes (EASY-NanoLC, ThermoScientific, USA). Nano-ESI was  
261 performed directly from the column and ions were analysed by using an LTQ Orbitrap Velos Pro  
262 (ThermoScientific, USA). Ions were analysed using a Top-10 data-dependent switching mode with the  
263 10 most intense ions selected for HCD for peptide identification and reporter ion fragmentation in the  
264 Orbitrap. Automatic gain control targets were 30,000 for the iontrap and 1,000,000 for the orbitrap

265

### 266 Quantitative MS Data analysis

267 Tandem mass spectra were extracted from the Xcalibur data system (version 2.2, ThermoScientific,  
268 USA) and searched through Mascot (v. 2.6.0) using Proteome Discoverer software (version 1.4.0.288,  
269 ThermoScientific, USA) to determine specific peptides and proteins. The parameters included: 20 ppm  
270 peptide precursor mass tolerance; 0.5 Da for the fragment mass tolerance; 2 missed cleavages, trypsin  
271 enzyme; TMT-6plex (N-terminus and K), carbamidomethyl (C) and oxidation (M) dynamic modifications;  
272 database: UniProt\_HUMAN (release-2018\_02, 20 366 entries). False discovery rate was set at 0.05  
273 and 0.01 for relaxed and strict parameters respectively, with validation based on q-Value. The data

## TRP channels agonists modify the salivary proteome

274 were analysed using KNIME and embedded R scripts (KNIME analytics platform, Germany). Peptides  
275 were excluded from analysis if they were unassigned or had missing TMT channel intensity data; the  
276 primary accession number was taken for each peptide and proteins were grouped by this accession  
277 number with the geomean of individual peptide intensities given as the protein intensity value; TMT  
278 intensities were normalised using a sum scaling method and to the geomean of the two standard values  
279 for each peptide. Batches were then concatenated, batch corrected using ComBat (43) and PCA,  
280 clustering (XMeans and k-Means), gene ontology (GO) and specific protein analyses (fold changes and  
281 TTests) were carried out. Venn diagrams were produced using Venny 2.1  
282 (<http://bioinfogp.cnb.csic.es/tools/venny/>). As the ComBat algorithm is only applicable to proteins  
283 present in all batches, a novel method of comparing samples across batches was developed. PCA plots  
284 of each non-ComBat corrected batch were carried out separately and Euclidean distances between  
285 each post-mouth rinse sample and the relevant unstimulated pool calculated. These Euclidean  
286 distances were then expressed relative to the distance between the two unstimulated pools which are  
287 present in each batch and, in theory, will vary to the same degree in each batch (Supplementary Figure  
288 a).

289

### 290 Total protein concentration assay

291 The total protein concentration of collected saliva samples were determined by bicinchoninic acid assay  
292 (Thermo Scientific). Frozen saliva samples were defrosted on ice and then diluted 1:10 in ddH<sub>2</sub>O in  
293 duplicate alongside a serial dilution of bovine serum albumin standard (2 mg/mL - 0.03125 mg/mL).  
294 Samples and standards were incubated with bicinchoninic acid for 30 minutes prior to measuring  
295 absorbance as 540 nm using an iMark microplate absorbance reader (BioRad).

296

### 297 Sodium dodecyl sulphate polyacrylamide gel electrophoresis

298 Sodium dodecyl sulphate polyacrylamide gel electrophoresis (SDS PAGE) was carried out on saliva  
299 samples. Saliva samples were prepared for electrophoresis by dilution 4x concentration LDS sample  
300 buffer (Invitrogen) with the addition of 0.5M DTT (Sigma) to the sample-buffer solution and then boiled  
301 for 3 minutes. Pre-cast 4-12% NuPage Novex Bis-Tris gels (Invitrogen) were assembled in a XCell  
302 vertical electrophoresis unit (Invitrogen) with MES running buffer (Invitrogen). Samples were loaded  
303 with equal protein concentration and electrophoresed for 32 minutes at 125 mA and 200 V (constant).

## TRP channels agonists modify the salivary proteome

304 Molecular masses were determined by comparison with SeeBlue Plus2 standard proteins (Thermo  
305 Scientific).

306

### 307 Glycoprotein staining

308 Polyacrylamide gels were placed in 0.2% Coomassie Brilliant Blue R250 in 25% methanol and 10%  
309 acetic acid at room temperature for 90 minutes, followed by overnight de-staining in 10% acetic acid.

310 Periodic acid Schiff's (PAS) staining: 60 minute fixing in 25% methanol and 10% acetic acid, incubation  
311 with 1% periodic acid followed by water rinsing and Schiff's reagent staining. Gels were imaged using  
312 the ChemiDoc MP Imaging System (BioRad).

313

### 314 Immunoblotting

315 Separated proteins were electroblotted to nitrocellulose membranes for 60 minutes at 190 mA and 30  
316 V (constant). Blots were blocked in 5% semi skimmed milk (Fluka) and probed with either an affinity-  
317 purified antibody fraction of mouse antiserum to a synthetic peptide of human cystatin-s corresponding  
318 to amino acid residues 21-141 (AF1296, R&D Systems) or an affinity-purified goat antibody raised  
319 against a peptide mapping at the C-terminus of human amylase (sc-12821, Santa Cruz). Binding was  
320 detected using a horseradish-peroxidase-labelled, affinity purified goat-ant-rabbit IgG (P0160, Agilent  
321 Dako) or rabbit-anti-mouse IgG (P0161, Agilent Dako) followed by Clarity Western ECL substrate  
322 detection system. Chemiluminescence was detected by ChemiDoc MP Imaging System (BioRad).

323 Molecular masses were determined by comparison with SeeBlue Plus2 standard proteins (Thermo  
324 Scientific).

325

### 326 Ethics

327 This study was approved by the King's College London Ethics Committee (BDM/12/13-54).and written  
328 informed consent was obtained from all study participants.

329

### 330 Statistical Analysis

331 Data were tested for normality using the Shapiro-Wilks normality test. 1-way ANOVA were used for  
332 determining statistically significant differences within the lower labial gland flow rates, parotid gland flow  
333 rates, protein output, cystatin S abundance datasets and, in the in-depth analysis, grouped WMS flow

## TRP channels agonists modify the salivary proteome

334 rate and protein output datasets. A 2-way ANOVA was used for determining statistically significant  
335 differences within the WMS flow rate datasets and, in the in-depth analysis, in the subject separated  
336 WMS flow rate and protein output datasets. The above analyses were carried out using Prism 6  
337 software (GraphPad). The following were used to denote statistically significant differences in the  
338 figures: \*\*\*\* =  $P \leq 0.0001$ , \*\*\* =  $P \leq 0.001$ , \*\* =  $P \leq 0.01$ , \* =  $P \leq 0.05$ .

339

### 340 Data Availability

341 The PD 1.4 protein search file result containing accession numbers, percentage protein coverage,  
342 number of distinct peptides and quantification measurements can be found in Supplementary Tables 1  
343 -6. The raw-files and PD1.4 search files (protein and peptide) have been deposited to the  
344 ProteomeXchange Consortium via the PRIDE partner repository with the dataset identifier PXD017232  
345 (Reviewer account details: Username: reviewer76888@ebi.ac.uk; Password: o52lEXbo).

TRP channels agonists modify the salivary proteome

## 346 **Results**

### 347 TRP agonists stimulate salivary secretion

348 Significantly greater relative WMS flow rates were observed in response to the TRP agonist containing  
349 mouth rinses when compared to the UWMS flow rate (Figure 1a). Furthermore, 1 ppm nonivamide and  
350 500 ppm menthol mouth rinsing significantly increased relative mean WMS flow rates compared to PG  
351 mouth rinsing, which itself significantly increased WMS flow rates compared to UWMS. The  
352 reproducibility of WMS flow rates in response to menthol and nonivamide mouth rinsing was  
353 demonstrated by repeating measurements with two of the participants (Figure 2a). All the mouth rinses  
354 increased mean WMS flow rate compared to unstimulated WMS (UWMS) flow rate (1.0 g/min). The  
355 highest concentrations of the three TRP channel agonists stimulated the greatest flow rates; 1.70 ml/min  
356 with 500 ppm menthol, 1.61 g/min with 300 ppm cinnamaldehyde and 1.67 g/min with 1 ppm nonivamide  
357 (Figure 2a (top)). When individual participants were considered, Figure 2a (bottom), we found that only  
358 participant 1 showed significantly greater stimulated flow rates.

359

360 Nonivamide (1 ppm) mouth rinsing stimulated lower labial minor gland flow rate compared to the  
361 unstimulated flow rate (Figure 1b) but no mouth rinse caused parotid gland flow rates to significantly  
362 differ from unstimulated or water stimulated flows (Figure 1c).

363

364 TRP agonist mouth rinsing, as well as PG, caused greater WMS protein output (Figure 1d). These  
365 effects were shown to be less reproducible than the effects on flow rate (Figure 2b vs 3a). Although  
366 mean output in response to 1 ppm nonivamide (1.36 mg/min) and 500 ppm menthol (1.17 mg/min) were  
367 greater than UWMS (0.99 mg/min), these increases were not significant and can be attributed to  
368 participant 1, who showed a significantly greater response than participant 2 (Figure 2d).

369

### 370 *Salivary proteomics overview*

371 Overall 459 unique proteins were identified in saliva samples. The number of unique proteins identified  
372 in each of the 6 separate batches of samples varied from 199 to 158. Sixty four unique proteins were  
373 identified in all 6 sample batches (Figure 3a). Two reference proteomes were used to compare the  
374 proteins identified in this study to those identified in the literature. In a meta-analysis of proteins  
375 identified across six studies, Sivadasan et al. produced the largest publicly available “human salivary

## TRP channels agonists modify the salivary proteome

376 proteome", consisting of 3449 unique human proteins (44). A second reference proteome was obtained  
377 from ProteomeDB (<https://www.proteomicsdb.org/>) which contained 1993 unique human proteins.

378

379 Our study identified 288 unique human proteins absent from both datasets and so, to the best of our  
380 knowledge, are novel findings for the salivary proteome (Figure 3b). Greater confidence can be  
381 assigned to the 134 proteins that have a SwissProt annotation score of 5, relating to strong evidence  
382 of their existence *in vivo*, and of these, 12 were identified with at least one unique peptide across the  
383 batches, of which 9 had a relative abundance of less than 0.2%.

384

### 385 Sources of variation in the salivary proteome

386 When all samples were labelled by participant and condition (Figure 3c), it is clear that samples are  
387 discriminated by participant along the x-axis (PCA1). Furthermore, if the geomean of the replicates of  
388 each condition are taken (Figure 4) and k-means clustering (number of clusters having been determined  
389 by x-means) applied then 100% of participant 2 samples cluster together and 89% of participant 1  
390 samples cluster together. All stimulated samples from participant 2 clustered separately from the  
391 unstimulated sample, reflecting that this subject was a responder. In contrast none of the stimulated  
392 samples from participant 1 clustered separately from unstimulated samples, reflecting that this subject  
393 was a non-responder. Since the x-axis represents the principal component responsible for the majority  
394 of the variation in the dataset (57.1%), we conclude that the person the saliva comes is the major source  
395 of variation between WMS proteomes.

396

397 The geomeans of post-mouth rinse samples were separated by mouth rinse primarily on the y-axis of  
398 Figure 4, representing the principal component responsible for 19.3% of variation in the dataset. For  
399 both participants, post-PG and cinnamaldehyde mouth rinse coordinates associated together,  
400 suggesting that the cinnamaldehyde mouth rinses were not causing additional variation in the WMS  
401 proteome than was already induced by the PG in the mouth rinse. However, post-nonivamide and  
402 menthol coordinates were separated from the PG coordinates suggesting these compounds were  
403 inducing proteome changes independently of PG (note the lower concentrations of PG in nonivamide  
404 and menthol mouth rinses compared to cinnamaldehyde (Table 2).

405

## TRP channels agonists modify the salivary proteome

406

407 Supplementary Figure b shows the mean ( $\pm$ SEM) variability of each post-mouth rinse sample to the  
408 unstimulated pool in both participants. Nonivamide caused changes in the WMS proteome in both  
409 participants, 1 ppm in participant 1 and 0.6 ppm in participant 2. Cinnamaldehyde (300 ppm) and to a  
410 lesser degree menthol (300 ppm) caused relatively large changes in the WMS proteome of participant  
411 1. Large variation was sometimes seen in the proteome response to the same mouth rinse in the same  
412 participant, as indicated by the large SEM values, for example in participant 1-300 ppm menthol and  
413 participant 2-0.6 ppm nonivamide. In contrast, some mouth rinses cause very repeatable changes, for  
414 example 300 ppm menthol in participant 2 and 0.6 ppm nonivamide in participant 1.

415

### 416 Specific protein changes

417 Ten unique proteins were significantly regulated by TRP channel agonist stimulation (Table 4), five of  
418 which belong to the cystatin family. Salivary cystatins (S, SA or SN) were upregulated in response to  
419 every mouth rinse with the greatest degree of upregulation observed in response to nonivamide mouth  
420 rinses. The peptides assigned to each of these proteins (13, 10 and 17 to S, SA and SN respectively)  
421 were unique. Additionally, cystatin D was upregulated at both concentrations of nonivamide and cystatin  
422 C was upregulated after 1 ppm nonivamide mouth rinsing. Menthol at 500 ppm caused upregulation in  
423 salivary cystatins to a greater extent than PG. Although salivary cystatins were upregulated after  
424 cinnamaldehyde mouth rinsing, it was less than with PG mouth rinses despite the same concentration  
425 of PG being present in  $1.8 \times 10^4$  ppm and  $3.0 \times 10^4$  ppm PG to 180 ppm and 300 ppm cinnamaldehyde  
426 respectively. The finding that salivary cystatins are upregulated by 1 ppm nonivamide mouth rinsing  
427 was supported by qualitative immunoprobings (Figure 5). Statistically significant greater cystatin S was  
428 observed in WMS after 1 ppm nonivamide mouth rinsing (Figure 5c).

429

430 Two other proteins were upregulated in the dataset, prolactin-inducible protein was upregulated after  
431 both PG and cinnamaldehyde mouth rinsing whilst neutrophil defensin 1 ( $\alpha$ -defensin) was upregulated  
432 in response to PG (Table 4). Cinnamaldehyde (180 ppm) resulted in the down-regulation of IgG-3 chain  
433 C region, caspase recruitment domain-containing protein 10 (CARD10) (also downregulated in 300 ppm  
434 cinnamaldehyde) and phosphoglycerate kinase 1 (PGK1). IgG-3 chain C region was also  
435 downregulated in response to nonivamide.



## TRP channels agonists modify the salivary proteome

### 436 **Discussion**

437 In this study we have found that mouth rinsing with menthol or nonivamide increases WMS flow rate  
438 (Figure 1 & Figure 2). These observations expand on the current reports in the literature that TRPV1  
439 agonists, such as piperine, nonivamide, capsaicin and 6-gingerol can stimulate salivary secretion since  
440 stimulation of salivary secretion by menthol has not previously been described. We have further found  
441 that nonivamide can stimulate minor gland secretion. Cinnamaldehyde mouth rinse did not evoke a  
442 salivary response even though it was perceived to be as intense or more intense than the menthol or  
443 nonivamide mouth rinses (Supplementary data c), which indicates that salivary responses are TRP  
444 agonist specific. The effect of a cinnamaldehyde mouth rinse was no greater than the vehicle PG but  
445 both were greater than unstimulated WMS (Figure 1a). Nonivamide, menthol and PG increased outputs  
446 of total protein in saliva suggesting that the protein composition and properties of saliva might be  
447 altered. Cinnamaldehyde decreased protein secretion compared to the PG vehicle. This is likely due  
448 to cinnamaldehyde diminishing the sialogogic properties of PG through a reaction between the  
449 compounds rather than inhibiting the nerve mediated reflex PG induces as no inhibitory neurones exist  
450 (45). The source of increased protein secretion is presumably salivary gland exocytosis of protein  
451 storage granules but it may be that there are other contributions from within the oral cavity. In order to  
452 investigate further, quantitative changes in salivary protein composition we implemented a bottom-up  
453 mass spectrometry pipeline new to salivary proteomics, which led to the identification of novel whole  
454 WMS proteome changes and specific protein changes in response to the TRP channel agonists studied.  
455 From PCA we identified that the largest source of variation in the salivary proteome was between  
456 subjects but that changes in the proteome were also caused by different mouth rinses (Figure 4).  
457 Repeat analyses on subjects demonstrated that there was variation from day to day in response to  
458 some of the mouth rinses.

459

460 The mass spectrometry pipeline applied in this study produced results that contribute to the salivary  
461 proteome literature, since it identified proteins in saliva that have not previously been reported  
462 (Supplementary Table). This may be due to the novel application of IEF using OFFGEL electrophoresis  
463 with TMT labelled quantitative tandem mass spectrometry LC-MS/MS to salivary proteomics but may  
464 also be the result of searching against updated databases or inter-personal differences in salivary  
465 composition, which has previously been observed to have a larger coefficient of variation than intra-

## TRP channels agonists modify the salivary proteome

466 personal variation (46). Three previous studies of WMS have used IEF in tandem mass spectrometry  
467 (47-49), and a further study coupled it with mTRAQ quantification methodology (50). However, these  
468 studies did not couple IEF with isobaric labelling such as TMT. It could be that the novel methodology  
469 contributes to better identification of lower abundance proteins, or this could be a result of the  
470 experimental stochasticity in bottom-up mass spectrometry approaches, the use of updated protein  
471 sequence database or differences in raw data analysis software. Despite being in lower abundance,  
472 the novel proteins are of sufficient length (median amino acid length being 897 and ranging from 97 to  
473 7570) to produce detectable tryptic peptides. This suggests that the method is not just identifying small  
474 proteins with a high abundance but proteins of a range of sizes with relative abundances ranging from  
475 3.2% of total peptides to < 0.005% (Supplementary table). A bottom-up approach was implemented  
476 with the intention to maximise the quantification of the salivary proteome. With 459 proteins quantified,  
477 the coverage was limited when compared to other TMT quantification studies with more state of the art  
478 equipment. Furthermore, good proteome coverage that also represents the variety of gene products  
479 has been achieved in top-down and data independent acquisition proteomic studies and could be used  
480 to further investigate the diversity of the salivary proteome (51, 52).

481

482 The presence of some lower abundance proteins appeared to be influenced by mouth rinsing, for  
483 example CARD10 and phosphoglycerate kinase 1 (PGK1), which were 0.3 and 0.2% of total identified  
484 peptides respectively (Table 4). This is the first time CARD10 has been identified in WMS. Both  
485 CARD10 and PGK1 were downregulated specifically in response to cinnamaldehyde mouth rinsing.  
486 Despite there being no previous reports of association between CARD10 and cinnamaldehyde, there  
487 have been previous reports of cinnamaldehyde inhibiting other caspase recruitment domain proteins in  
488 mice and subsequent anti-inflammatory effects (10). Similarly, there have been no previous reports of  
489 an association between cinnamaldehyde and PGK1. However, anti-angiogenesis properties of  
490 cinnamaldehyde and cinnamon extract have been previously reported (12-14). The observation of  
491 down-regulation of CARD10 and PGK1 could be preliminary evidence that the anti-inflammatory and  
492 bactericidal effects of cinnamaldehyde extend to short term mouth rinsing in the oral cavity.

493

494 Upregulation of cystatin S in the WMS secreted in response to nonivamide was detected by mass  
495 spectrometry and western blotting (Figure 5). Despite significant sequence homology between the

## TRP channels agonists modify the salivary proteome

496 salivary cystatins, the peptides assigned to S, SN and SA were unique to each protein. Furthermore,  
497 the antibody used in western blotting had a reasonable specificity for cystatin S, with 30% and 5% cross  
498 reactivity to cystatins SN/SA or D/C respectively. To further increase the confidence in specificity, a top  
499 down approach could be used as demonstrated in the literature (53). Greater quantities of cystatin S in  
500 saliva could result in an improvement in mucosal adhesion, a property of saliva important in mouthfeel  
501 and xerostomia. Cystatin S has been shown to interact with oral mucosal surfaces and play a role in  
502 the formation of protein pellicles *in vitro* on hydrophobic surfaces that mimic the mucosa (54). Coupled  
503 with previous observations that the rheological properties of saliva are modified by nonivamide (29, 55),  
504 mouth rinsing with nonivamide as a treatment for xerostomia warrants further study. Increased cystatin  
505 S expression may have other potential benefits for oral health. due to inhibition of cysteine protease  
506 activity, as indicated by significant enrichment of the “negative regulation of cysteine-type  
507 endopeptidase activity” GO. The upregulation of the GO for cysteine protease inhibition mirrors the  
508 western blotting findings and work in the literature (56, 57). Cystatin S has been shown to inhibit  
509 proteolytic activity in the culture supernatant of *P. gingivalis* (58), a Gram negative bacterial species  
510 that produces the gingipain class of cysteine proteases which are implicated in periodontal disease  
511 (59). Additionally, cystatin S, as well as prolactin-inducible protein, upregulation could improve  
512 acceptance of bitter taste as indicated by the GO enrichment “detection of chemical stimulus involved  
513 in sensory perception of bitter taste” (60). This suggests that TRPV1 agonists could be used to promote  
514 the consumption of bitter foods, the reduced consumption of which has been implicated in the health,  
515 dietary intake and weight of “super tasters” (61).

516

517 This study is the first to demonstrate an acute salivary cystatin S response to TRPV1 agonists in  
518 humans (Figure 5). A cystatin S-like protein response to capsaicin has been demonstrated in rats fed  
519 on a capsaicin-adulterated diet; the presence of a new protein in rat saliva was demonstrated and the  
520 protein found to have cystatin S-like properties such as inhibition of cysteine protease activity (57). In  
521 the rat increased cystatin S-like protein levels enhanced consumption of a capsaicin rich diet and it was  
522 hypothesised that this response may be triggered by irritation of the oral mucosa (56). Although these  
523 studies, along with the current study, both show increases in cystatin S and cystatin S-like proteins in  
524 saliva, the time scales over which the phenomenon occurs are significantly different. The current study  
525 shows the reversible increase within two minutes of nonivamide mouth rinsing whilst in the studies in

## TRP channels agonists modify the salivary proteome

526 rat the increase was observed after three days of capsaicin-adulterated diet, suggesting different  
527 mechanisms are responsible. The increase in cystatin S levels in WMS in the current study must be  
528 due to the release of preformed protein as it takes 30 minutes for newly synthesised protein containing  
529 vesicles to pass from the rough endoplasmic reticulum to the condensing vacuoles in secretory cells  
530 (62).

531

532 The identification of proteins regulated across all mouth rinses alongside proteins only regulated in  
533 response to one mouth rinse suggests, in agreement with the total protein secretion data, that there are  
534 different mechanisms responsible for the regulation of proteins in WMS. Furthermore, some of the  
535 proteins are known to be produced by the salivary glands whereas others are non-salivary proteins.  
536 The upregulation of salivary cystatins (S, SN and SA) may reflect a preferential stimulation of the  
537 submandibular/sublingual glands, the primary producers of salivary cystatins (63). Cystatin S regulation  
538 may be influenced by direct effects of the agonists on minor glands, as lower labial gland flow rates  
539 were greater after 1 ppm nonivamide mouth rinsing (Figure 1b) and they have been demonstrated to  
540 express cystatin S and other salivary proteins (64). Menthol, cinnamaldehyde and nonivamide are  
541 highly lipophilic compounds, having partition coefficient values (an indicator of lipophilicity; higher  
542 values imply greater lipophilicity) of 3, 1,9 and 4.2 respectively. Comparatively, pilocarpine, a drug that  
543 has previously been used to directly stimulate minor salivary glands (65), has a partition coefficient  
544 value of 1.1 (66). Higher lipophilicity suggests that these TRP channel agonists would have a greater  
545 permeability in the oral epithelium and lamina propria than pilocarpine, which would enhance direct  
546 activation of TRP channels expressed in minor glands.

547

548 The significantly greater WMS flow rates observed in the proteomics study (Figure 2a) are primarily the  
549 result of the response from one of the two participants, with the other showing little response to the TRP  
550 agonists. There is a precedence in sensory science for responders/non-responders, such as in the case  
551 of the detection of the bitter compound PROP which is associated with the expression of the TAS2R28  
552 bitter receptor gene (67). Although the comparison seems to be limited by the fact that participants in  
553 the current study do have a sensory perception of the TRP agonists, the mechanism for salivary  
554 secretion in response to TRP agonist detection is yet to be elucidated and unknown genetic factors  
555 could be responsible for the prevalence of salivary non-responders to TRP agonists despite a sensory

## TRP channels agonists modify the salivary proteome

556 perception. A breakdown of the dataset shown in Figure 1a reveals that only 2 of the 19 participants  
557 given a TRP containing mouth rinse did not exhibit an increase in WMS flow rate (as defined by a flow  
558 rate 150% that of unstimulated flow rate). This suggests that the prevalence of non-responders in the  
559 population is lower than the 50% suggested in the proteomics study.

560

561 In summary this study provides the first evidence for stimulation of salivary secretion by a non-TRPV1  
562 TRP channel agonist. Increased minor gland secretion may be a direct action of the TRP agonists on  
563 submucosal salivary glands alongside nerve-mediated mechanisms. Furthermore, novel changes in the  
564 proteome of the saliva secreted in response to the TRPV1 agonist nonivamide were identified by mass  
565 spectrometry and supported by western blotting. These findings suggest that TRP channel agonists  
566 can be explored as potential candidates for altering salivary secretion, particularly in subjects with  
567 xerostomia and reduced levels of saliva.

568

### 569 **Acknowledgements**

570 The authors would like to acknowledge a BBSRC PhD Case Studentship subsidized by Symrise AG as  
571 the source of funding for the work. Grant number: BB/L015498/1.

572

### 573 **Data Availability**

574 The raw-files and PD1.4 search files (protein and peptide) have been deposited to the  
575 ProteomeXchange Consortium via the PRIDE partner repository with the dataset identifier PXD017232  
576 (Reviewer account details: Username: reviewer76888@ebi.ac.uk; Password: o52lEXbo).

577

### 578 **References**

- 579 1. Hand AR, Frank ME. Fundamentals of oral histology and physiology. Ames, Iowa: John Wiley  
580 & Sons Inc.; 2014. p. p.
- 581 2. Kido MA, Muroya H, Yamaza T, Terada Y, Tanaka T. Vanilloid receptor expression in the rat  
582 tongue and palate. *J Dent Res.* 2003;82(5):393-7.
- 583 3. Ishida Y, Ugawa S, Ueda T, Murakami S, Shimada S. Vanilloid receptor subtype-1 (VR1) is  
584 specifically localized to taste papillae. *Mol Brain Res.* 2002;107(1):17-22.
- 585 4. Wang B, Danjo A, Kajiya H, Okabe K, Kido MA. Oral Epithelial Cells are Activated via TRP  
586 Channels. *J Dent Res.* 2011;90(2):163-7.
- 587 5. Lyall V, Heck GL, Vinnikova AK, Ghosh S, Phan THT, Alam RI, et al. The mammalian amiloride-  
588 insensitive non-specific salt taste receptor is a vanilloid receptor-1 variant. *J Physiol-London.*  
589 2004;558(1):147-59.
- 590 6. Smith KR, Treesukosol Y, Paedae AB, Contreras RJ, Spector AC. Contribution of the TRPV1  
591 channel to salt taste quality in mice as assessed by conditioned taste aversion generalization and  
592 chorda tympani nerve responses. *Am J Physiol-Reg I.* 2012;303(11):R1195-R205.

## TRP channels agonists modify the salivary proteome

- 593 7. Ban A, Marincsak R, Biro T, Perkecz A, Gomori E, Sandor K, et al. Upregulation of Transient  
594 Receptor Potential Vanilloid Type-1 Receptor Expression in Oral Lichen Planus. *Neuroimmunomodulat.*  
595 2010;17(2):103-8.
- 596 8. Bandell M, Story GM, Hwang SW, Viswanath V, Eid SR, Petrus MJ, et al. Noxious cold ion  
597 channel TRPA1 is activated by pungent compounds and bradykinin. *Neuron.* 2004;41(6):849-57.
- 598 9. Lee SH, Lee SY, Son DJ, Lee H, Yoo HS, Song S, et al. Inhibitory effect of 2'-  
599 hydroxycinnamaldehyde on nitric oxide production through inhibition of NF- $\kappa$ B activation in RAW 264.7  
600 cells. *Biochemical Pharmacology.* 2005;69(5):791-9.
- 601 10. Lee SC, Wang SY, Li CC, Liu CT. Anti-inflammatory effect of cinnamaldehyde and linalool from  
602 the leaf essential oil of *Cinnamomum osmophloeum* Kanehira in endotoxin-induced mice. *J Food Drug*  
603 *Anal.* 2018;26(1):211-20.
- 604 11. Hancı D, Altun H, Çetinkaya EA, Muluk NB, Cengiz BP, Cingi C. Cinnamaldehyde is an effective  
605 anti-inflammatory agent for treatment of allergic rhinitis in a rat model. *International Journal of Pediatric*  
606 *Otorhinolaryngology.* 2016;84:81-7.
- 607 12. Eisenberg DM, Harris ESJ, Littlefield BA, Cao SG, Craycroft JA, Scholten R, et al. Developing  
608 a library of authenticated Traditional Chinese Medicinal (TCM) plants for systematic biological  
609 evaluation - Rationale, methods and preliminary results from a Sino-American collaboration. *Fitoterapia.*  
610 2011;82(1):17-33.
- 611 13. Kwon BM, Lee SH, Cho YK, Bok SH, So SH, Youn MR, et al. Synthesis and biological activity  
612 of cinnamaldehydes as angiogenesis inhibitors. *Bioorg Med Chem Lett.* 1997;7(19):2473-6.
- 613 14. Kwon HK, Jeon WK, Hwang JS, Lee CG, So JS, Park JA, et al. Cinnamon extract suppresses  
614 tumor progression by modulating angiogenesis and the effector function of CD8(+) T cells. *Cancer Lett.*  
615 2009;278(2):174-82.
- 616 15. Wu S-J, Ng L-T, Lin C-C. Cinnamaldehyde-induced apoptosis in human PLC/PRF/5 cells  
617 through activation of the proapoptotic Bcl-2 family proteins and MAPK pathway. *Life Sciences.*  
618 2005;77(8):938-51.
- 619 16. Ka H, Park H-J, Jung H-J, Choi J-W, Cho K-S, Ha J, et al. Cinnamaldehyde induces apoptosis  
620 by ROS-mediated mitochondrial permeability transition in human promyelocytic leukemia HL-60 cells.  
621 *Cancer Lett.* 2003;196(2):143-52.
- 622 17. Park K-R, Nam D, Yun H-M, Lee S-G, Jang H-J, Sethi G, et al.  $\beta$ -Caryophyllene oxide inhibits  
623 growth and induces apoptosis through the suppression of PI3K/AKT/mTOR/S6K1 pathways and ROS-  
624 mediated MAPKs activation. *Cancer Lett.* 2011;312(2):178-88.
- 625 18. Ng L-T, Wu S-J. Antiproliferative Activity of *Cinnamomum cassia* Constituents and Effects of  
626 Pifithrin-Alpha on Their Apoptotic Signaling Pathways in Hep G2 Cells. *Evidence-Based*  
627 *Complementary and Alternative Medicine.* 2011;2011:6.
- 628 19. Peier AM, Moqrich A, Hergarden AC, Reeve AJ, Andersson DA, Story GM, et al. A TRP channel  
629 that senses cold stimuli and menthol. *Cell.* 2002;108(5):705-15.
- 630 20. Haas JS, Whipple RE, Grant PM, Andresen BD, Volpe AM, Pelkey GE. Chemical and elemental  
631 comparison of two formulations of oleoresin capsicum. *Science & Justice.* 1997;37(1):15-24.
- 632 21. Watanabe S, Dawes C. The Effects of Different Foods and Concentrations of Citric-Acid on the  
633 Flow-Rate of Whole Saliva in Man. *Arch Oral Biol.* 1988;33(1):1-5.
- 634 22. Chauncey HH, Shannon IL, Feller RP. Effect of Acid Solutions on Human Gustatory  
635 Chemoreceptors as Determined by Parotid Gland Secretion Rate. *P Soc Exp Biol Med.*  
636 1963;112(4):917-&.
- 637 23. Hodson NA, Linden RWA. The effect of monosodium glutamate on parotid salivary flow in  
638 comparison to the response to representatives of the other four basic tastes. *Physiology & Behavior.*  
639 2006;89(5):711-7.
- 640 24. Stolle T, Grondinger F, Dunkel A, Meng C, Medard G, Kuster B, et al. Salivary Proteome  
641 Patterns Affecting Human Salt Taste Sensitivity. *J Agr Food Chem.* 2017;65(42):9275-86.
- 642 25. Nasrawi CW, Pangborn RM. Temporal Gustatory and Salivary Responses to Capsaicin Upon  
643 REpeated Stimulation. *Physiology & Behavior.* 1990;47(4):611-5.
- 644 26. Lawless H, Rozin P, Shenker J. Effects of Oral Capsaicin on Gustatory, Olfactory and Irritant  
645 Sensations and Flavor Identification in Humans Who Regularly or Rarely Consume Chili Pepper. *Chem*  
646 *Senses.* 1985;10(4):579-89.
- 647 27. Dunér-Engström M, Fredholm BB, Larsson O, Lundberg JM, Saria A. Autonomic Mechanisms  
648 Underlying Capsaicin Induces Oral Sensations and Salivation In Man. *J Physiol-London.* 1986;373:87-  
649 96.
- 650 28. Kono Y, Kubota A, Taira M, Katsuyama N, Sugimoto K. Effects of oral stimulation with capsaicin  
651 on salivary secretion and neural activities in the autonomic system and the brain. *J Dent Sci.*  
652 2018;13(2):116-23.



## TRP channels agonists modify the salivary proteome

- 653 29. Gardner A, So P-W, Carpenter G. Endogenous salivary citrate is associated with enhanced  
654 rheological properties following oral capsaicin stimulation. *Experimental Physiology*. 2020;105(1):96-  
655 107.
- 656 30. Thomson WM, Poulton R, Broadbent JM, Al-Kubaisy S. Xerostomia and medications among  
657 32-year-olds. *Acta Odontol Scand*. 2006;64(4):249-54.
- 658 31. Carpenter GH. *Dry Mouth*. 1 ed: Springer-Verlag Berlin Heidelberg; 2015.
- 659 32. Lussi A, Schlueter N, Rakhmatullina E, Ganss C. Dental erosion--an overview with emphasis  
660 on chemical and histopathological aspects. *Caries Res*. 2011;45 Suppl 1:2-12.
- 661 33. Dawes C. Physiological Factors Affecting Salivary Flow-Rate, Oral Sugar Clearance, and the  
662 Sensation of Dry Mouth in Man. *J Dent Res*. 1987;66:648-53.
- 663 34. Ship JA, Fox PC, Baum BJ. How Much Saliva Is Enough - Normal Function Defined. *J Am Dent*  
664 *Assoc*. 1991;122(3):63-9.
- 665 35. Pramanik R, Osailan SM, Challacombe SJ, Urquhart D, Proctor GB. Protein and mucin  
666 retention on oral mucosal surfaces in dry mouth patients. *European Journal of Oral Sciences*.  
667 2010;118(3):245-53.
- 668 36. Carpenter GH. Artificial Salivas: Why Are They Not More Useful? In: Carpenter GH, editor. *Dry*  
669 *Mouth: A Clinical Guide on Causes, Effects and Treatments*. 1 ed: Springer-Verlag Berlin Heidelberg;  
670 2015.
- 671 37. Lee VM, Linden RW. An olfactory-submandibular salivary reflex in humans. *Experimental*  
672 *Physiology*. 1992;77(1):221-4.
- 673 38. Lee VM, Linden RWA. The effect of odours on stimulated parotid salivary flow in humans.  
674 *Physiology & Behavior*. 1992;52(6):1121-5.
- 675 39. Mackie DA, Pangborn RM. Mastication and Its Influence on Human Salivary Flow and Alpha-  
676 Amylase Secretion. *Physiology & Behavior*. 1990;47(3):593-5.
- 677 40. Neyraud E, Sayd T, Morzel M, Dransfield E. Proteomic Analysis of Human Whole and Parotid  
678 Salivas Following Stimulation by Different Tastes. *Journal of Proteome Research*. 2006;5(9):2474-80.
- 679 41. Bader M, Dunkel A, Wenning M, Kohler B, Medard G, del Castillo E, et al. Dynamic Proteome  
680 Alteration and Functional Modulation of Human Saliva Induced by Dietary Chemosensory Stimuli. *J Agr*  
681 *Food Chem*. 2018;66(22):5621-34.
- 682 42. Bader M, Stolle T, Jennerwein M, Hauck J, Sahin B, Hofmann T. Chemosensate-Induced  
683 Modulation of the Salivary Proteome and Metabolome Alters the Sensory Perception of Salt Taste and  
684 Odor-Active Thiols. *J Agr Food Chem*. 2018;66(29):7740-9.
- 685 43. Johnson WE, Li C, Rabinovic A. Adjusting batch effects in microarray expression data using  
686 empirical Bayes methods. *Biostatistics*. 2007;8(1):118-27.
- 687 44. Sivadasan P, Gupta MK, Sathe GJ, Balakrishnan L, Palit P, Gowda H, et al. Human salivary  
688 proteome - a resource of potential biomarkers for oral cancer. *J Proteomics*. 2015;127:89-95.
- 689 45. Garrett JR, Ekstrom J, Anderson LC. Neural Mechanisms of Salivary Gland Secretion. In:  
690 Linden RWA, editor. *Frontiers of Oral Biology*: Karger; 1999. p. 26-43.
- 691 46. Jehmlich N, Dinh KHD, Gesell-Salazar M, Hammer E, Steil L, Dhople VM, et al. Quantitative  
692 analysis of the intra- and inter-subject variability of the whole salivary proteome. *Journal of Periodontal*  
693 *Research*. 2013;48(3):392-403.
- 694 47. Bencharit S, Altarawneh SK, Baxter SS, Carlson J, Ross GF, Border MB, et al. Elucidating role  
695 of salivary proteins in denture stomatitis using a proteomic approach. *Mol Biosyst*. 2012;8(12):3216-23.
- 696 48. Bandhakavi S, Stone MD, Onsongo G, Van Riper SK, Griffin TJ. A Dynamic Range  
697 Compression and Three-Dimensional Peptide Fractionation Analysis Platform Expands Proteome  
698 Coverage and the Diagnostic Potential of Whole Saliva. *Journal of Proteome Research*.  
699 2009;8(12):5590-600.
- 700 49. Cargile BJ, Bundy JL, Freeman TW, Stephenson JL. Gel Based Isoelectric Focusing of  
701 Peptides and the Utility of Isoelectric Point in Protein Identification. *Journal of Proteome Research*.  
702 2004;3(1):112-9.
- 703 50. Bandhakavi S, Van Riper SK, Tawfik PN, Stone MD, Haddad T, Rhodus NL, et al. Hexapeptide  
704 Libraries for Enhanced Protein PTM Identification and Relative Abundance Profiling in Whole Human  
705 Saliva. *Journal of Proteome Research*. 2011;10(3):1052-61.
- 706 51. Bruderer R, Bernhardt OM, Gandhi T, Xuan Y, Sondermann J, Schmidt M, et al. Optimization  
707 of Experimental Parameters in Data-Independent Mass Spectrometry Significantly Increases Depth and  
708 Reproducibility of Results. *Mol Cell Proteomics*. 2017;16(12):2296-309.
- 709 52. Smith LM, Kelleher NL, Linial M, Goodlett D, Langridge-Smith P, Ah Goo Y, et al. Proteoform:  
710 a single term describing protein complexity. *Nature Methods*. 2013;10(3):186-7.

## TRP channels agonists modify the salivary proteome

- 711 53. Manconi B, Liori B, Cabras T, Vincenzoni F, Iavarone F, Castagnola M, et al. Salivary Cystatins:  
712 Exploring New Post-Translational Modifications and Polymorphisms by Top-Down High-Resolution  
713 Mass Spectrometry. *Journal of Proteome Research*. 2017;16(11):4196-207.
- 714 54. Yakubov GE, Macakova L, Wilson S, Windust JHC, Stokes JR. Aqueous lubrication by  
715 fractionated salivary proteins: Synergistic interaction of mucin polymer brush with low molecular weight  
716 macromolecules. *Tribology International*. 2015;89:34-45.
- 717 55. Houghton JW, Hans J, Pesaro M, Ley JP, Carpenter GH, Proctor G. Sensory effects of transient  
718 receptor potential channel agonists on whole mouth saliva extensional rheology. *Journal of Texture*  
719 *Studies*. 2017;48(4):313-7.
- 720 56. Katsukawa H, Shang Y, Nakashima K, Yang KH, Ohashi R, Sugita D, et al. Salivary cystatins  
721 influence ingestion of capsaicin-containing diets in the rat. *Life Sciences*. 2002;71(4):457-67.
- 722 57. Katsukawa H, Ninomiya Y. Capsaicin induces cystatin S-like substances in submandibular  
723 saliva of the rat. *J Dent Res*. 1999;78(10):1609-16.
- 724 58. Blankenvoorde MFJ, Henskens YMC, vanHof W, Veerman ECI, Amerongen AVN. Inhibition of  
725 the growth end cysteine proteinase activity of *Porphyromonas gingivalis* by human salivary cystatin S  
726 and chicken cystatin. *Biol Chem*. 1996;377(12):847-50.
- 727 59. How KY, Song KP, Chan KG. *Porphyromonas gingivalis*: An Overview of Periodontopathic  
728 Pathogen below the Gum Line. *Frontiers in Microbiology*. 2016;7:53.
- 729 60. Morzel M, Chabanet C, Schwartz C, Lucchi G, Ducrooy P, Nicklaus S. Salivary protein profiles  
730 are linked to bitter taste acceptance in infants. *Eur J Pediatr*. 2014;173(5):575-82.
- 731 61. Chamoun E, Mutch DM, Allen-Vercoe E, Buchholz AC, Duncan AM, Spriet LL, et al. A review  
732 of the associations between single nucleotide polymorphisms in taste receptors, eating behaviors, and  
733 health. *Critical Reviews in Food Science and Nutrition*. 2018;58(2):194-207.
- 734 62. Palade G. Intracellular aspects of the process of protein synthesis. *Science*.  
735 1975;189(4200):347-58.
- 736 63. Baron AC, DeCarlo AA, Featherstone JDB. Functional aspects of the human salivary cystatins  
737 in the oral environment. *Oral Dis*. 1999;5(3):234-40.
- 738 64. Siqueira WL, Salih E, Wan DL, Helmerhorst EJ, Oppenheim FG. Proteome of human minor  
739 salivary gland secretion. *J Dent Res*. 2008;87(5):445-50.
- 740 65. Taweekhaisupapong S, Pesee M, Aromdee C, Laopaiboon M, Khunkitti W. Efficacy of  
741 pilocarpine lozenge for post-radiation xerostomia in patients with head and neck cancer. *Aust Dent J*.  
742 2006;51(4):333-7.
- 743 66. Kim S, Thiessen PA, Bolton EE, Chen J, Fu G, Gindulyte A, et al. PubChem Substance and  
744 Compound databases. *Nucleic Acids Research*. 2016;44(Database issue):D1202-D13.
- 745 67. Duffy VB, Davidson AC, Kidd JR, Kidd KK, Speed WC, Pakstis AJ, et al. Bitter Receptor Gene  
746 (TAS2R38), 6-n-Propylthiouracil (PROP) Bitterness and Alcohol Intake. *Alcoholism: Clinical and*  
747 *Experimental Research*. 2004;28(11):1629-37.
- 748



TRP channels agonists modify the salivary proteome

749 **Tables**

750

751 Table 1. Demographic information of participants in the WMS study

752

753

754

| Study          | Mean age | SEM | <i>n</i> | Male | Female |
|----------------|----------|-----|----------|------|--------|
| Nonivamide     | 25.3     | 2.1 | 7        | 4    | 3      |
| Menthol        | 27.2     | 1.5 | 6        | 3    | 3      |
| Cinnamaldehyde | 27.6     | 4.1 | 6        | 3    | 3      |
| PG             | 27.2     | 2.5 | 6        | 3    | 3      |

## TRP channels agonists modify the salivary proteome

755 Table 2. The concentrations of mouth rinses used in each saliva collection of the proteomics study.  
756 Each collection consisted of an unstimulated saliva sample, followed by a 30 second mouth rinse and  
757 then 2 x 1 minute post-mouth rinse saliva samples. Each collection was carried out in triplicate for two  
758 participants, totalling 48 collections. The compound, concentration and PG content in each of the mouth  
759 rinses used for this study are shown in the table.

760  
761

| Compound       | Concentration (ppm) | PG dilution           |
|----------------|---------------------|-----------------------|
| PG             | $1.8 \times 10^4$   | n/a                   |
| PG             | $3.0 \times 10^4$   | n/a                   |
| Menthol        | 300                 | $6.0 \times 10^3$ ppm |
| Menthol        | 500                 | $1.0 \times 10^4$ ppm |
| Cinnamaldehyde | 180                 | $1.8 \times 10^4$ ppm |
| Cinnamaldehyde | 300                 | $3.0 \times 10^4$ ppm |
| Nonivamide     | 0.6                 | $6.0 \times 10^2$ ppm |
| Nonivamide     | 1.0                 | $1.0 \times 10^3$ ppm |

TRP channels agonists modify the salivary proteome

Table 3. Quantitative analysis of the salivary proteome: TMT 10plex batch information. Note: P=pool.

| TMT Label | Compound       | Concentration (ppm)   | TMT 10plex                         |     |     |     |     |     |
|-----------|----------------|-----------------------|------------------------------------|-----|-----|-----|-----|-----|
|           |                |                       | 1                                  | 2   | 3   | 4   | 5   | 6   |
|           |                |                       | Sample ID (Participant #.repeat #) |     |     |     |     |     |
| 126       | Unstimulated   | na                    | 1.P                                | 1.P | 1.P | 1.P | 1.P | 1.P |
| 127_N     | Unstimulated   | na                    | 2.P                                | 2.P | 2.P | 2.P | 2.P | 2.P |
| 127_C     | Cinnamaldehyde | 180                   | 2.2                                | 1.2 | 1.3 | 2.1 | 1.1 | 2.3 |
| 128_N     | Nonivamide     | 0.6                   | 1.2                                | 2.1 | 1.1 | 2.2 | 2.3 | 1.3 |
| 128_C     | Cinnamaldehyde | 300                   | 1.1                                | 1.3 | 2.1 | 2.2 | 1.2 | 2.3 |
| 129_N     | PG             | 3.0 x 10 <sup>4</sup> | 1.1                                | 2.2 | 2.3 | 1.2 | 1.3 | 2.1 |
| 129_C     | Menthol        | 500                   | 2.3                                | 1.2 | 1.3 | 2.2 | 2.1 | 1.1 |
| 130_N     | PG             | 1.8 x 10 <sup>4</sup> | 2.2                                | 2.1 | 1.3 | 1.1 | 2.3 | 1.2 |
| 130_C     | Menthol        | 300                   | 2.2                                | 1.2 | 2.1 | 1.3 | 1.1 | 2.3 |
| 131       | Nonivamide     | 1                     | 1.2                                | 2.1 | 1.3 | 2.2 | 1.1 | 2.3 |

762

763

764

TRP channels agonists modify the salivary proteome

765

766 Table 4. WMS proteins regulated by TRP channel agonist mouth rinsing

767 Fold change in geomean (compared to unstimulated saliva) of WMS proteins after rinsing with TRP

768 channel agonist or vehicle with significant regulation ( $p < 0.05$ ) across both participants. Fold changes

769 recognised as up- or downregulated are highlighted in green and red respectively. Blanks indicate that

770 protein was present but not regulated. Additionally: the total number of peptides identified across all 6

771 batches is reported as well as the mean protein coverage across the six batches.

| Protein ID | Protein Name                | Total peptides identified (% of total) | Mean protein coverage (%) | PG                        |                           | Cinnamaldehyde |         | Menthol |         | Nonivamide |       |
|------------|-----------------------------|----------------------------------------|---------------------------|---------------------------|---------------------------|----------------|---------|---------|---------|------------|-------|
|            |                             |                                        |                           | 1.8 x 10 <sup>4</sup> ppm | 3.0 x 10 <sup>4</sup> ppm | 180 ppm        | 300 ppm | 300 ppm | 500 ppm | 0.6 ppm    | 1 ppm |
| P12273     | Prolactin-inducible protein | 258 (0.95)                             | 13.58                     | 1.92                      | 1.82                      | 1.60           | 1.73    |         |         |            |       |
| P59665     | Neutrophil defensin 1       | 367 (1.35)                             | 24.83                     | 1.62                      | 1.57                      |                |         |         |         |            |       |
| P01034     | Cystatin-C                  | 205 (0.76)                             | 40.41                     |                           |                           |                |         |         |         |            | 1.56  |
| P28325     | Cystatin-D                  | 202 (0.75)                             | 31.80                     |                           |                           |                |         |         |         | 1.64       | 1.79  |
| P01036     | Cystatin-S                  | 1227 (4.53)                            | 76.59                     |                           | 1.57                      | 1.59           | 1.61    |         | 1.66    | 1.81       | 1.72  |
| P09228     | Cystatin-SA                 | 326 (1.2)                              | 38.89                     |                           | 2.08                      | 1.72           | 1.87    | 1.77    | 2.02    | 2.15       | 2.14  |
| P01037     | Cystatin-SN                 | 4024 (14.84)                           | 66.55                     |                           | 1.52                      |                |         |         | 1.68    | 1.82       | 1.79  |
| P01860     | Ig gamma-3 chain C region   | 74 (0.27)                              | 14.15                     |                           |                           | 0.52           |         |         |         | 0.63       | 0.56  |
| Q9BWT7     | CARD10                      | 74 (0.27)                              | 1.45                      |                           |                           | 0.66           | 0.66    |         |         |            |       |
| P00558     | Phosphoglycerate kinase 1   | 60 (0.22)                              | 7.00                      |                           |                           | 0.43           |         |         |         |            |       |

772

TRP channels agonists modify the salivary proteome

773  
774

Figures

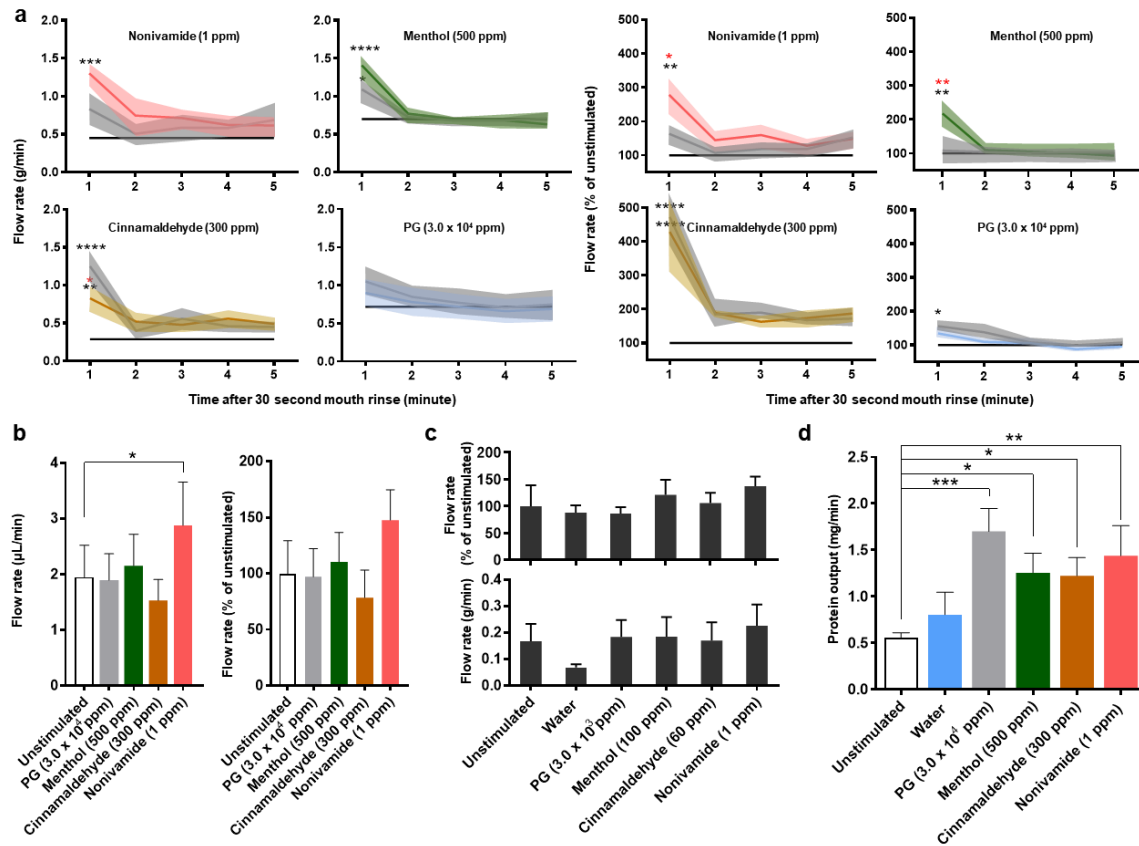

Figure 1. Effect of TRP channel agonists on salivary flow rates and protein output.

- WMS flow rate after 30 seconds of mouth rinsing expressed as absolute values (left) and relative to the unstimulated flow rate (right) ( $n = 6$ ). Solid coloured lines indicate means and shaded areas indicate SEM. Grey indicates vehicle control (PG) at concentration used for the TRP agonist mouth rinse. Black line indicates mean unstimulated WMS flow rate. The blue line in the PG plots indicate water. Black \* indicates significance versus unstimulated and red \* indicates significance versus PG.
- Lower labial minor salivary gland flow rate after two minutes of mouth rinsing (Mean  $\pm$  SEM;  $n = 10$ ).
- Parotid saliva flow rate during two minutes of mouth rinsing (Mean  $\pm$  SEM;  $n = 8$ ).
- WMS protein output after 30 seconds of mouth rinsing (Mean  $\pm$  SEM;  $n = 6$ ).

775

TRP channels agonists modify the salivary proteome

776

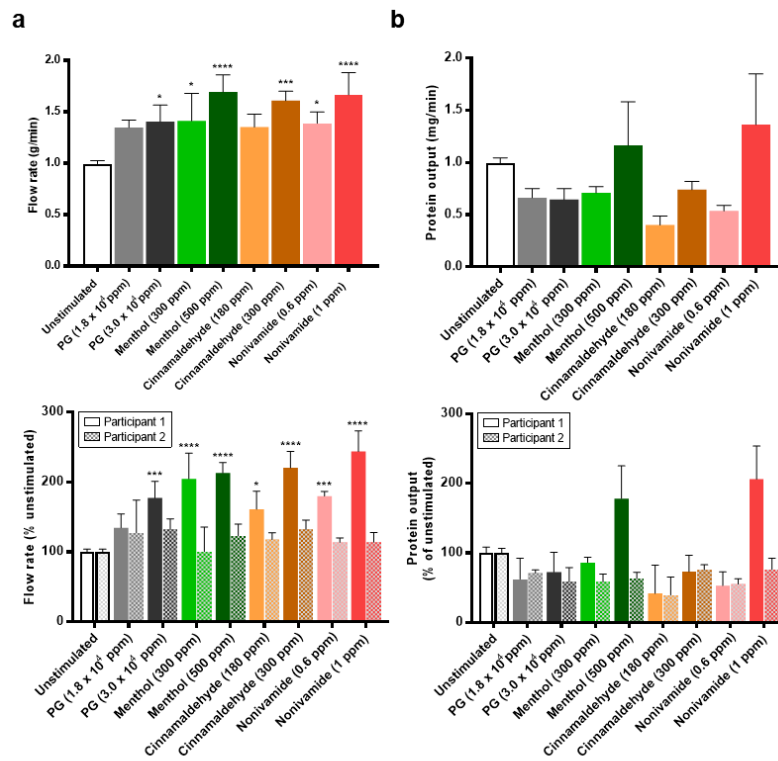

Figure 2. Reproducibility of the sialogogic properties of TRP channel mouth rinses.

- WMS flow rates of unstimulated saliva and stimulated saliva during the first minute after mouth rinse stimulation (top) and participant separated values relative to the unstimulated flow rate on the day of sampling (bottom).
- WMS protein output of unstimulated saliva and post-mouth rinse salivas in the two minutes after stimulation (top) and participant separated values relative to unstimulated protein output (bottom).

All figures show mean  $\pm$ SEM. Top figures:  $n = 6$ , unstimulated  $n = 48$ ; Bottom figures:  $n = 3$ , unstimulated  $n = 24$ ; \*, \*\*, \*\*\* and \*\*\*\* = P value from unstimulated  $\leq 0.05$ , 0.01, 0.001 and 0.0001 respectively.

TRP channels agonists modify the salivary proteome

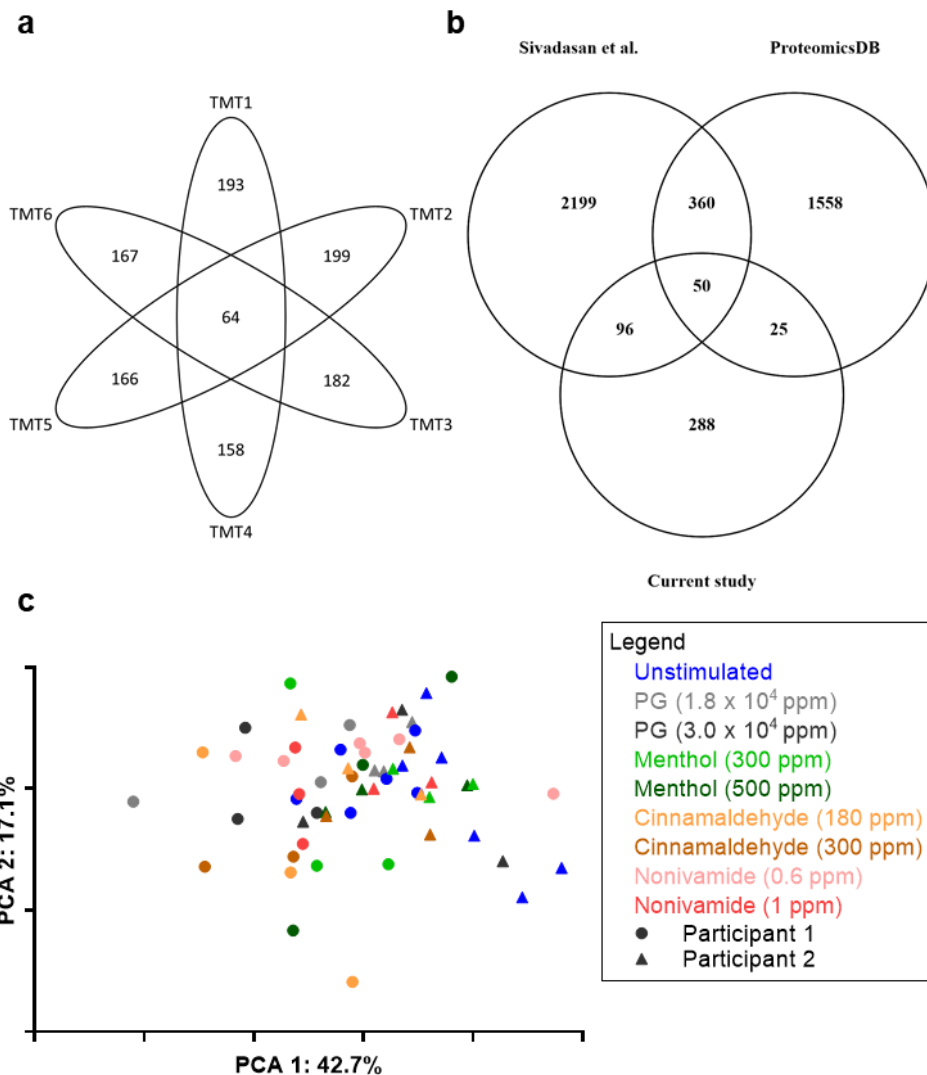

777  
778

Figure 3. Proteomics overview

- Venn diagram showing total number of identified proteins in each TMT10plex (outer) and the number of proteins identified in all TMT10plexes (inner) for all samples in each TMT10plex.
- Venn diagram showing the unique and common proteins identified in the current study, from a reference database (ProteomicsDB) and a meta-analysis of the salivary proteome by Sivadasan et al. 2015.
- PCA plot showing the distribution of unstimulated pools and post-mouth rinse WMS sample after ComBat batch correction.

## TRP channels agonists modify the salivary proteome

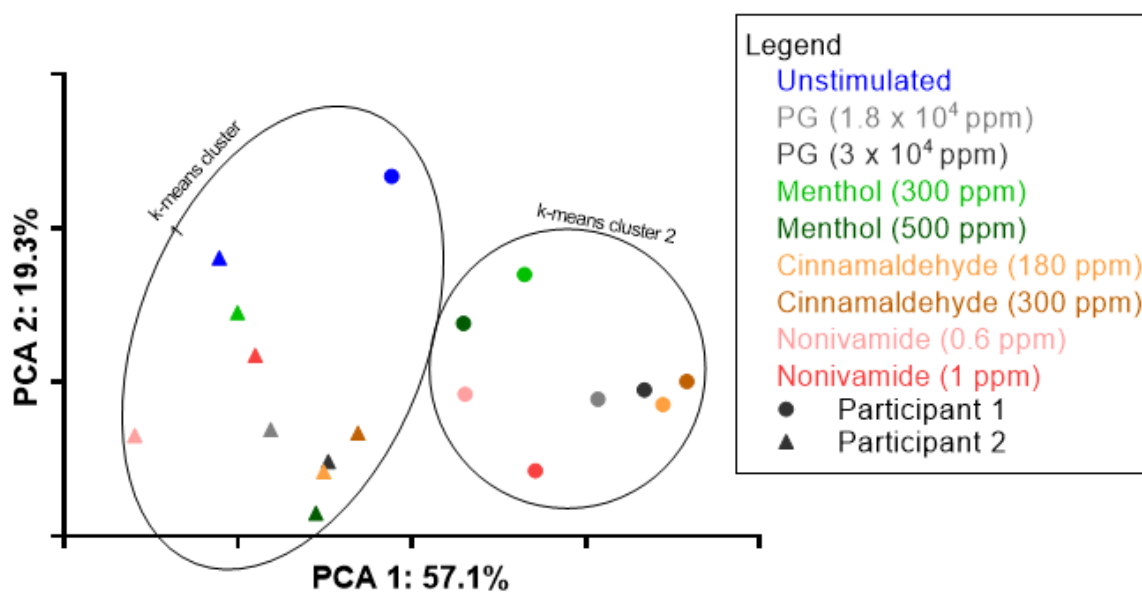

Figure 4. Identification of sources of variation in the salivary proteome

- a) PCA plot showing the distribution of the geomean of each of the sample conditions with highlighted k-means clusters



## TRP channels agonists modify the salivary proteome

780

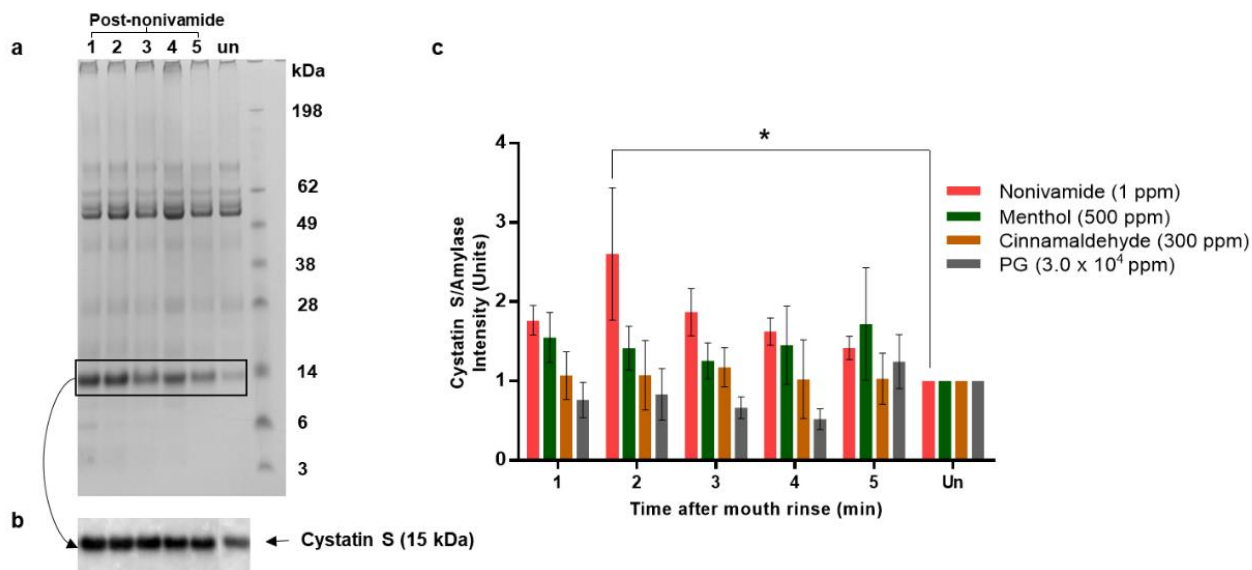

781

Figure 5. WMS cystatin S abundance after TRP channel agonist mouth rinsing.

- An example of Coomassie blue and PAS stained salivary proteins separated by SDS PAGE from one participant demonstrating how the cystatin S band intensities increase after nonivamide
- Western blot of the same samples as in a) identifying the protein band as cystatin S. (un: unstimulated, 1 - 5: 1 - 5 min after mouth rinse).
- Intensity of the cystatin S band on a western blot, relative to the amylase western blot band intensity, in WMS collected after a 30 second TRP agonist mouth rinse normalised to unstimulated saliva (Mean±SEM; n = 6).
